# Supplementary material for: Monounsaturated Fatty Acids Are Substrates for Aldehyde Generation in Tellurite-ExposedEscherichia coli
Source: Hindawi journal article supplement (doi:10.1155/2013/563756), 2013-01-01
Supplement: f1 [file 563756.f1.pdf]

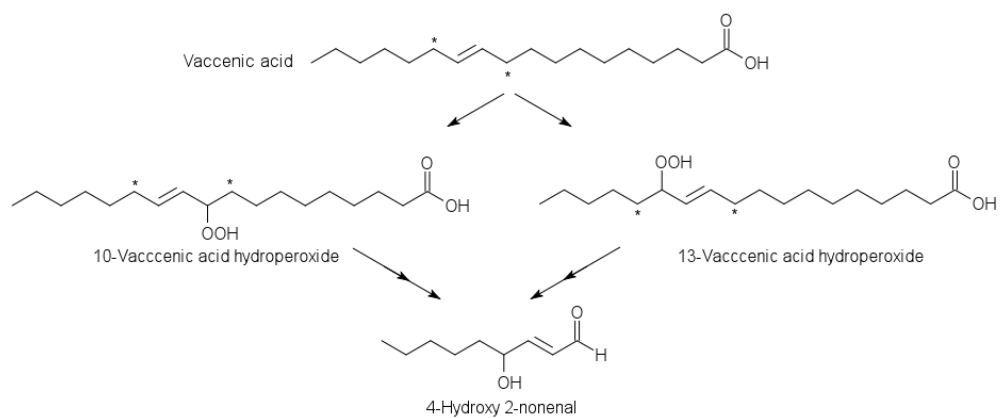

**Fig. S1.** Pradenas *et al.*
